# Supplementary material for: Importance of Patient Involvement in Creating Content for eHealth Interventions: Qualitative Case Report in Orthopedics
Source: PubMed Central journal article supplement (PMC9672996; doi:10.2196/39637), 2022-11-03
Supplement: formative_v6i11e39637_app1.pdf [file formative_v6i11e39637_app1.pdf]

**Table S1. Semi Structured Interview Topic Guide**

| <b>Question</b>                                                  | <b>Answer</b>                                                                     |
|------------------------------------------------------------------|-----------------------------------------------------------------------------------|
| What is your name                                                |                                                                                   |
| What is your age                                                 |                                                                                   |
| When was your TRK                                                |                                                                                   |
| What is your home situation                                      | <input type="checkbox"/> Living alone<br><input type="checkbox"/> Living together |
| <b>Work</b>                                                      |                                                                                   |
| Did you have a job before the surgery                            | <input type="checkbox"/> No<br><input type="checkbox"/> Yes _____                 |
| Have you already (partly) started working again?                 | <input type="checkbox"/> No<br><input type="checkbox"/> Yes                       |
| Did you expect this in terms of duration or loading of the knee? | <input type="checkbox"/> No<br><input type="checkbox"/> Yes                       |
| <b>Care</b>                                                      |                                                                                   |
| Were you an informal care giver before the surgery?              | <input type="checkbox"/> No<br><input type="checkbox"/> Yes                       |
| Have you (party) resumed these activities already?               | <input type="checkbox"/> No<br><input type="checkbox"/> Yes                       |
| Did you expect this in terms of duration or loading of the knee? | <input type="checkbox"/> No<br><input type="checkbox"/> Yes                       |
|                                                                  |                                                                                   |
| <b>Hobbies &amp; Sport</b>                                       |                                                                                   |
| Did you practice sports of hobbies before the surgery?           | <input type="checkbox"/> No<br><input type="checkbox"/> Yes                       |
| Have you (party) resumed these activities already?               | <input type="checkbox"/> No<br><input type="checkbox"/> Yes                       |
| Did you expect this in terms of duration or loading of the knee? | <input type="checkbox"/> No<br><input type="checkbox"/> Yes,                      |
|                                                                  |                                                                                   |
| <b>Recovery</b>                                                  |                                                                                   |
| How satisfied are you with the recovery so far?                  | [                                                                                 |
| What went better than expected?                                  |                                                                                   |

|                                                                                                                                                                                                                      |  |
|----------------------------------------------------------------------------------------------------------------------------------------------------------------------------------------------------------------------|--|
| What was disappointing so far? E.g. Pain, exercises, wound care, complications, medication usage, lowering medication dose, self care, sleeping, ADL, groceries, showering, walking, cycling, bending the knee, etc. |  |
| Did you, in hindsight, have a realistic view on the recovery trajectory?                                                                                                                                             |  |
|                                                                                                                                                                                                                      |  |
| <b>Information</b>                                                                                                                                                                                                   |  |
| In what way could the hospital have supported you better in terms of information provisioning?<br>(Link these to the topics that were disappointing so far)                                                          |  |
| Why does this information matter to you                                                                                                                                                                              |  |
| At what point in the knee journey would you like to have known about this?                                                                                                                                           |  |
| What sources of information did you use?                                                                                                                                                                             |  |
|                                                                                                                                                                                                                      |  |
|                                                                                                                                                                                                                      |  |
|                                                                                                                                                                                                                      |  |
| <b>App</b>                                                                                                                                                                                                           |  |
| Are you familiar with the hospital's app?                                                                                                                                                                            |  |
| How could they improve the app?                                                                                                                                                                                      |  |
|                                                                                                                                                                                                                      |  |
| <b>End</b>                                                                                                                                                                                                           |  |
