# Supplementary material for: Importance of Patient Involvement in Creating Content for eHealth Interventions: Qualitative Case Report in Orthopedics
Source: PubMed Central journal article supplement (PMC9672996; doi:10.2196/39637), 2022-11-03
Supplement: formative_v6i11e39637_app2.pdf [file formative_v6i11e39637_app2.pdf]

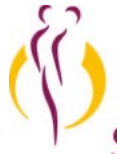

*St. Anna Ziekenhuis*

# **Focus Group Session**

## **Interview Study TKR recovery**

24 september 2020

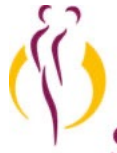

*St. Anna Ziekenhuis*

# Agenda

- 1. Introduction**
- 2. Backgrounds**
- 3. Aim for this session**
- 4. Results**
- 5. Suggestions for improvement**
- 6. Discussion**
- 7. Conclusion**
- 8. End**



*St. Anna Ziekenhuis*

# 1. Introduction

- Thomas, Walter, Ellis
- Please introduce yourselves

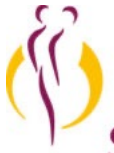

*St. Anna Ziekenhuis*

## 2. Backgrounds

- TKR is major surgery
- Importance of education to manage expectations, to prepare for surgery, to manage yourself after surgery, etc.
- Previously developed app: content developed with healthcare providers

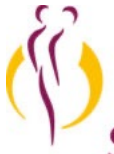

*St. Anna Ziekenhuis*

## 2. Backgrounds

- TKR is major surgery
- Importance of education to manage expectations, to prepare for surgery, to manage yourself after surgery, etc.
- Previously developed app: content developed with healthcare providers
- Where are you? The patients...
- Is the information you get enough? Does it cover the themes that matter to you?



*St. Anna Ziekenhuis*

## **2. Backgrounds**

- **We performed 11 interviews**
- **Over 9 hours of audio materials**
- **Transcribed and coded**



*St. Anna Ziekenhuis*

### **3. Aim**

- **Do you recognise our summary and findings?**
- **Did we identify the right themes?**
- **Did we translate your suggestion into usefull information?**



*St. Anna Ziekenhuis*

### **3. Aim**

- **The answer is up to you**
- **Your opinion is what matters most**
- **There are no wrong answers**
- **This is the moment to speak up**
- **After tonight we plan on implementing the changes in the app**





*St. Anna Ziekenhuis*

## 4. Results

- Theme by Theme
- Quotes to illustrate the theme
- Summary of findings



*St. Anna Ziekenhuis*

## 4. Results

- Question: which themes do you think we derived from the interviews

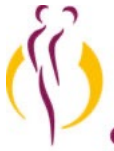

St. Anna Ziekenhuis

*“It was really 200% better than I expected... I started working behind the bar at the elderly center again about 8 weeks after surgery. I actually wanted to start again after 4 weeks, but my son and my GP wouldn’t allow me”*

*“I wouldn’t be able to tell you what went well so far. At the moment, my knee hurts more than before the surgery, while it was performed 10 weeks ago. I would have thought to have gained quite a lot in the first 6 weeks already”.*



**St. Anna Ziekenhuis**

***Guess which theme the quotes belong to...***

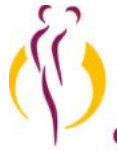

*St. Anna Ziekenhuis*

## Expectations versus reality

- Major differences in the duration and progression of the recovery
- Only 2 patients are positive, overall the recovery took longer than expected
- Most of you mentioned “the 6 weeks after surgery”, expecting things to improve from that moment onwards



**St. Anna Ziekenhuis**

***“My orthopedic surgeon had clearly told me that after the surgery it would start to hurt even more and then get better, he was completely right”***

***“After the operation, I was almost unable to sleep. I was used to sleep very well, but now I lay awake all night with a feeling of restlessness in my legs. After a week of bad sleep, you are really exhausted”.***



**St. Anna Ziekenhuis**

***Guess which theme the quotes belong to...***

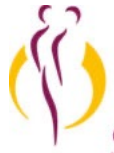

*St. Anna Ziekenhuis*

## Postoperative Pain

- Pain is a central theme during the recovery
- For most of you, the pain was more intense than expected
- Pain medication did not always work, and some suffered from side-effects
- Pain during the night was highly unexpected
- Numb feeling of the knee or shooting pain throughout the night





**St. Anna Ziekenhuis**

***“I read the app completely, I really liked that. When I received a push notification, I read the information right away”***

***“You don't really know what's normal. You won't find those feelings anywhere. What am I supposed to feel now? Is this normal? That is of course something very personal, I understand that”***



**St. Anna Ziekenhuis**

***Guess which theme the quotes belong to...***



*St. Anna Ziekenhuis*

## Informational and educational materials

- Differences in the level of detail you prefer
- Everyone downloaded the app. Not everyone activated the notifications.
- Videos were much appreciated
- The app could contain more practical information



**St. Anna Ziekenhuis**

***“What actually remains underexposed is the importance of the therapy. The entire course of your rehabilitation depends on how good the therapy and the therapist are.”***

***“What amazes me a bit, and I’m sure they all mean it well, is that one therapist says: “You have to jump to the left” and then the other comes in and says: “What are you doing? You have to jump to the right.”***



**St. Anna Ziekenhuis**

***Guess which theme the quotes belong to...***



*St. Anna Ziekenhuis*

## Physiotherapy exercises

- Everyone mentioned the importance of going to the physio therapist.
- Most of you regard their therapist as a personal coach
- Sometimes physio therapists advices contradict, which is very confusing
- Some of you feel it is rather strange to perform the first exercises directly after surgery



St. Anna Ziekenhuis

*“Yes, I can cycle. Distances of just 20 or 30 kilometers because my physical condition has deteriorated a bit.”*

*“When I get on the exercise bike in the morning, I do a few cycles forwards and backwards. Then, I can cycle for 10 to 12 minutes. The second time it takes a little longer to prepare, and in the evening, my knee is really stiff and thick.”*



**St. Anna Ziekenhuis**

***Guess which theme the quotes belong to...***





*St. Anna Ziekenhuis*

## Activities of Daily Living

- Major difference after 8 tot 10 weeks: being able to walk for 200 meters or cyclcy for 20 kilometers
- Cycling is more difficult than expected, often leading to stiffness and swelling of the knee
- Climbing the stairs, taking a shower are regarded as painful



St. Anna Ziekenhuis

*“ I thought it was great from the moment of admission onwards. In the operating room and the recovery room too, that all went perfectly.”*

*“After about a week, I also got a call (from one of the nurses). I could talk a little about medication. The person you are talking to is really someone who understands what you are going through.”*



**St. Anna Ziekenhuis**

*Guess which theme the quotes belong to...*



*St. Anna Ziekenhuis*

## Hospitalization & Aftercare

- Everyone appreciated their stay in the hospital
- Discharge process felt a bit hurried to some of you
- Some thought 1 night in the hospital was to short, other couldn't wait to get home



*St. Anna Ziekenhuis*

## 5. Suggestions for improvement

- Let's look at the hand-outs (these are the overviews we will present in the article, and we will use to optimize the content in the app)



*St. Anna Ziekenhuis*

## 6. Discussion

- **What do you think of the themes we identified and the suggestions for improvement**



*St. Anna Ziekenhuis*

## 7. Conclusion

- Do you think that implementing the results from the interviews and this session will lead to an improved version of the app?



*St. Anna Ziekenhuis*

## **8. End**

- **Thank you so much for your personal stories and the contribution to our project**
