# Supplementary material for: Importance of Patient Involvement in Creating Content for eHealth Interventions: Qualitative Case Report in Orthopedics
Source: PubMed Central journal article supplement (PMC9672996; doi:10.2196/39637), 2022-11-03
Supplement: formative_v6i11e39637_app3.pdf [file formative_v6i11e39637_app3.pdf]

**Table S2. Participant characteristics**

| <b>ID</b> | <b>Sex</b> | <b>Age</b> | <b>Setting</b> | <b>Interview duration (minutes)</b> | <b>Weeks after surgery</b> | <b>Living alone</b> | <b>(Unpaid) work</b> | <b>Sports or hobby</b> | <b>(Informal) care giver</b> |
|-----------|------------|------------|----------------|-------------------------------------|----------------------------|---------------------|----------------------|------------------------|------------------------------|
| PT01      | F          | 67         | WA             | 47                                  | 12                         | Y                   | N                    | Y                      | N                            |
| PT02      | M          | 62         | WA             | 43                                  | 10                         | N                   | N                    | N                      | Y                            |
| PT03      | F          | 67         | WA             | 38                                  | 9                          | N                   | Y                    | Y                      | N                            |
| PT04      | F          | 73         | WA             | 25                                  | 17                         | N                   | Y                    | Y                      | Y                            |
| PT05      | F          | 61         | WA             | 28                                  | 16                         | Y                   | N                    | N                      | N                            |
| PT06      | F          | 72         | WA             | 42                                  | 13                         | N                   | N                    | N                      | N                            |
| PT07      | F          | 66         | WA             | 30                                  | 11                         | N                   | Y                    | Y                      | Y                            |
| PT08      | F          | 72         | WA             | 45                                  | 17                         | N                   | Y                    | Y                      | Y                            |
| PT09      | M          | 57         | Home           | 57                                  | 15                         | Y                   | Y                    | Y                      | N                            |
| PT10      | M          | 57         | Hospital       | 48                                  | 11                         | N                   | Y                    | Y                      | N                            |
| PT11      | M          | 74         | WA             | 41                                  | 12                         | N                   | N                    | Y                      | N                            |
